# Supplementary material for: Dietary Predictors and Plasma Concentrations of Perfluorinated Compounds in a Coastal Population from Northern Norway
Source: Hindawi journal article supplement (doi:10.1155/2009/268219), 2009-01-01
Supplement: f1 [file 268219.f1.pdf]

Table S1. Target analytes and analytical standards, their abbreviation, quantification masses and cone voltages.

| Compound                                                | Abbreviation  | Quantification mass (m/z)<br>(Cone voltage (V)) |
|---------------------------------------------------------|---------------|-------------------------------------------------|
| 3,5-Bis(trifluoromethyl)phenyl acetic acid <sup>1</sup> | BTPA          | 227 (35)                                        |
| Mass labelled Perfluorooctanoate <sup>2</sup>           | 13 C-PFOA     | 372 (35)                                        |
| Mass labelled Perfluorooctane sulfonate <sup>2</sup>    | 13C-PFOS      | 503 (50)                                        |
| Perfluorooctanesulfonic acid                            | PFOSA         | 498 (35)                                        |
| Perfluorohexane sulfonate                               | PFHxS         | 399 (50)                                        |
| Perfluoroheptane sulfonate                              | PFHpS         | 449 (50)                                        |
| Perfluorooctane sulfonate branched isomers              | PFOS branched | 499 (50)                                        |
| Perfluorooctane sulfonate linear isomer                 | PFOS linear   | 499 (50)                                        |
| Perfluoroheptanoate                                     | PFHpA         | 319 (35)                                        |
| Perfluorooctanoate                                      | PFOA          | 369 (35)                                        |
| Perfluorononanoate                                      | PFNA          | 419 (35)                                        |

1. Used as recovery standard. 2. Used as internal standard. 3. Used as internal standard.

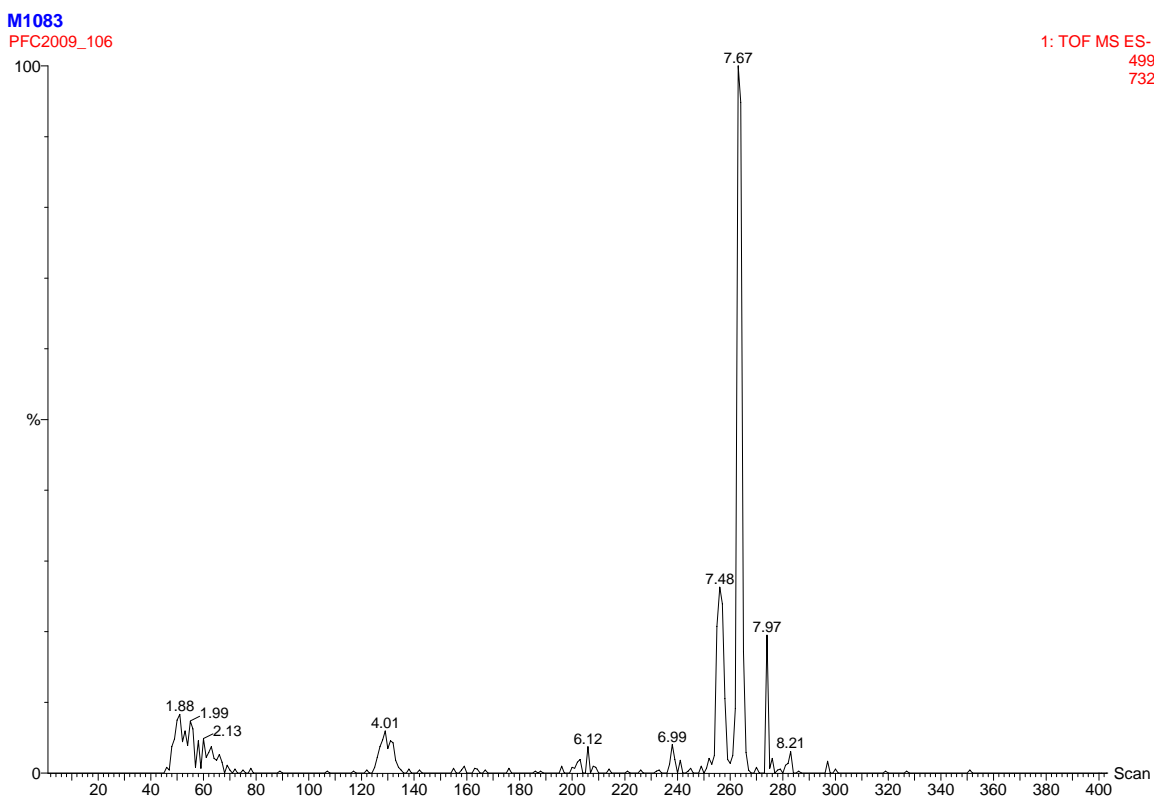

Fig S1. Chromatogram showing branched PFOS isomers at retention time 7.48 and the linear isomer at retention time 7.67.

**Table S2.** Correlation coefficients for the investigated PFCs.

|       | PFOS                | PFOA                | PFHxS               | PFHpS               | PFNA                | PFOSA               |
|-------|---------------------|---------------------|---------------------|---------------------|---------------------|---------------------|
| PFOS  | -                   | 0.56 <sup>***</sup> | 0.59 <sup>***</sup> | 0.93 <sup>***</sup> | 0.70 <sup>***</sup> | 0.45 <sup>***</sup> |
| PFOA  | 0.56 <sup>***</sup> | -                   | 0.53 <sup>***</sup> | 0.56 <sup>***</sup> | 0.37 <sup>**</sup>  | 0.18                |
| PFHxS | 0.59 <sup>***</sup> | 0.53 <sup>***</sup> | -                   | 0.56 <sup>***</sup> | 0.46 <sup>***</sup> | 0.23                |
| PFHpS | 0.93 <sup>***</sup> | 0.56 <sup>***</sup> | 0.56 <sup>***</sup> | -                   | 0.65 <sup>***</sup> | 0.41 <sup>**</sup>  |
| PFNA  | 0.70 <sup>***</sup> | 0.37 <sup>**</sup>  | 0.46 <sup>***</sup> | 0.65 <sup>***</sup> | -                   | 0.72 <sup>***</sup> |
| PFOSA | 0.45 <sup>***</sup> | 0.18                | 0.23                | 0.41 <sup>**</sup>  | 0.72 <sup>***</sup> | -                   |

<sup>\*\*\*</sup>  $p < 0.001$ .

<sup>\*\*</sup>  $p < 0.01$ .

<sup>\*</sup>  $p < 0.05$ .

PFOS, perfluorooctane sulfonate; PFOA, perfluorooctanoate; PFHxS, perfluorohexane sulfonate; PFHpS perfluoroheptane sulfonate; PFNA perfluorononanoate; PFOSA, perfluorooctane sulfonic acid.

**Table S3.** Intake frequencies of fatty fish and fruit and vegetables and corresponding median PFOS and PFHpS concentration (ng/ml) in the study group.

| Servings (150 g) of fatty fish /week         | Intake frequency <sup>*</sup> | Median PFOS (ng/ml)<br>(range) | Median PFHpS (ng/ml)<br>(range) |
|----------------------------------------------|-------------------------------|--------------------------------|---------------------------------|
| 0                                            | 15                            | 28 (12–52)                     | 0.52 (0.10–1.2)                 |
| <1                                           | 33 <sup>a</sup>               | 29 (6.9–99)                    | 0.44 (0.12–1.9)                 |
| 1–2                                          | 6                             | 25 (16–33)                     | 0.41 (0.27–0.89)                |
| 2–3                                          | 1                             | 67                             | 1.3                             |
| 3–4                                          | 0                             | –                              | –                               |
| 4–5                                          | 0                             | –                              | –                               |
| 5–6                                          | 1 <sup>a</sup>                | 93                             | 1.8                             |
| Servings (150 g) of fruit and vegetables/day | Intake frequency <sup>*</sup> | Median PFOS (ng/ml)<br>(range) | Median PFHpS (ng/ml)<br>(range) |
| 0                                            | 0                             | –                              | –                               |
| <1                                           | 3                             | 37 (37–99)                     | 0.62 (0.58–1.9)                 |
| 1–2                                          | 11                            | 24 (14–52)                     | 0.43 (0.17–1.2)                 |
| 2–3                                          | 21 <sup>a</sup>               | 29 (6.9–93)                    | 0.52 (0.12–1.8)                 |
| 3–4                                          | 13                            | 30 (16–52)                     | 0.45 (0.25–0.92)                |
| 4–5                                          | 4                             | 28 (12–31)                     | 0.47 (0.10–0.89)                |
| 5–6                                          | 2                             | 34 (19–50)                     | 0.39 (0.23–0.50)                |
| 6–7                                          | 2                             | 14 (12–15)                     | 0.26 (0.26–0.27)                |

Two outliers were excluded from the statistical analysis. <sup>a</sup> indicates which groups the outliers belonged to.
